# ***Staphylococcus epidermidis* metabolic adaptation and biofilm formation in response to varying oxygen.**

Ulrik H. Pedroza-Dávila<sup>1</sup>, Cristina Uribe-Alvarez<sup>1</sup>, Lilia Morales-García<sup>1</sup>, Emilio Espinoza-Simón<sup>1</sup>, Adriana Muhlia-Almazán<sup>2</sup>, Natalia Chiquete-Félix<sup>1</sup> & Salvador Uribe-Carvajal<sup>1,3</sup>.

<sup>1</sup>Department of Genetics and Molecular Biology, Instituto de Fisiología Celular, Universidad Nacional Autónoma de México (UNAM). México. <sup>2</sup>Centro de Investigación y Desarrollo en Alimentos, (CIAD) Hermosillo, Sonora, México.

<sup>3</sup>Corresponding author. [suribe@ifc.unam.mx](mailto:suribe@ifc.unam.mx)

## **ABSTRACT**

*Staphylococcus epidermidis* is a Gram-positive saprophytic bacterium found in the microaerobic/anaerobic layers of the skin. It becomes a health hazard when introduced across the skin by punctures or wounds. *S. epidermidis* forms biofilms in low O<sub>2</sub> environments. As oxygen concentrations ([O<sub>2</sub>]) decreased, the metabolism of *S. epidermidis* was modified ranging from fully aerobic to anaerobic. Respiratory activity increased at high [O<sub>2</sub>], while anaerobically grown cells exhibited the highest rate of fermentation. High aerobic metabolism coincided with high hydrogen peroxide-mediated damage. Remarkably, the rate of growth decreased at low [O<sub>2</sub>] even though the concentration of ATP was high. Under these conditions bacteria associated into biofilms. Then, in the presence of metabolic inhibitors, biofilm formation decreased. It is suggested that when [O<sub>2</sub>] is low *S. epidermidis* accumulates ATP in order to synthesize the proteins and polysaccharides needed to attach to surfaces and form biofilms.

**KEYWORDS:** *Staphylococcus epidermidis*, oxygen concentration, metabolism, biofilms, rate of oxygen consumption, fermentation.

## Importance

Bacteria and humans coexist, establishing all kinds of relationships that may change from saprophytic to infectious as environmental conditions vary. *S. epidermidis* is saprophytic when living in the skin. Inside the organism it evokes a pathologic reaction and is thus rejected by the organism. Additionally it is forced to adapt to high oxygen concentrations, becoming vulnerable to reactive oxygen species, which may come from leukocyte attack. Avoiding both, high oxygen and leukocytes is a must for bacteria. Escaping from oxygen involves a clever response: whenever it finds a low oxygen environment it attaches to surfaces, associating into biofilms. Biofilms protect *S. epidermidis* against host cells. Understanding these responses is a must in order to develop treatments and prevent infection success.

## INTRODUCTION

In mammals, saprophytic microorganisms contribute to the control of pathogenic bacteria, digestion of nutrients and synthesis of diverse coenzymes, prosthetic groups and amino acids [1]. On the skin the microorganism population is estimated at  $10^{11}$  to  $10^{12}$  cells [2, 3]. In the dermic layers, the saprophytic bacterium *Staphylococcus epidermidis* inhibits colonization by *Staphylococcus aureus* or *Streptococcus pyogenes* through secretion of proteases [4] and other antimicrobial compounds [5]. *S. epidermidis* is abundant in moist areas, occupying a micro-aerobic niche in dermis and epidermis and in the nearly anoxic sebaceous areas [6].

*S. epidermidis* may be accidentally internalized through wounds or punctures made after improper sterilizing procedures. Upon entry, this bacterium has to face high oxygen concentration [ $O_2$ ] and rejection from the immune system, a situation that most likely triggers a stress response [7]. As bacteria are carried through the organism, they may reach areas where low [ $O_2$ ], similar to that found in the skin layers that constitute its natural habitat, and it is likely that in an effort to remain in the hypoxic area, it adheres to epithelia or other surfaces and organizes into biofilms. This response protects *S. epidermidis* against both, phagocytosis and antibiotics [8]. In regard to low [ $O_2$ ] environments within the host, these are often found in the vicinity of artificial devices such as catheters or prosthetic valves, favoring bacterial biofilm formation and forcing implanted device removal [9, 10].

Understanding the *S. epidermidis* response to different [ $O_2$ ] would help optimize treatments [11]. Growing *S. epidermidis* at different [ $O_2$ ] leads to differential expression of redox enzymes in the respiratory chain and to different biofilm formation patterns [12]. At high [ $O_2$ ], high expression of cytochrome oxidases and NADH dehydrogenases is observed, while the tendency to form biofilms is minimal. In contrast, [ $O_2$ ] depletion increases nitrate reductase expression and biofilm generation [12].

The aerobic and anaerobic metabolism of *S. epidermidis* grown at different [ $O_2$ ] were evaluated. The rates of anaerobic fermentation and  $O_2$  consumption varied in opposite senses, i.e., increasing [ $O_2$ ] in the growth medium increased the

rate of oxygen consumption and decreased the rate of fermentation and vice-versa: at low  $[O_2]$ , the rate of oxygen consumption decreased while fermentation increased. In addition, it was observed that at high  $[O_2]$  the susceptibility of *S. epidermidis* to the toxic effects of hydrogen peroxide increased. Remarkably, in the micro- and anaerobic environments *S. epidermidis* growth was slower, while [ATP] was higher, probably indicating that cells were preparing to associate in biofilms [13]. When ATP synthesis was inhibited to different degrees by inhibitors of the respiration chain (cyanide) [12] or glycolysis (1, 4-bisphosphobutane) [14, 15], biofilm formation also decreased. For *S. epidermidis*, the advantage of anchoring itself in a biofilm would be to remain at its ideal  $[O_2]$ , while enhancing its resistance to antibodies or antibiotics [8]. To understand and prevent these processes, the physiology of *S. epidermidis* needs to be analyzed thoroughly.

## MATERIALS AND METHODS

### Bacterial strain and growth media.

*S. epidermidis* strain ATCC 12228 was donated by Dr. Juan Carlos Cancino Díaz (Instituto Politécnico Nacional, México). A loopful from the bacterium was suspended in 5 mL of 3% tryptic soy broth (Fluka, Sigma) and incubated at 37°C for 24 h. Subsequently, pre-cultures were added to 1 L LB medium (1% tryptone, 0.5% yeast extract, 1% NaCl) plus 2% glucose and incubated 24 hours at 30 °C under aerobic (shaking 150 rpm), microaerobic (5%  $CO_2$ , no agitation) or anaerobic (static in oxygen-depleted sealed acrylic chamber) conditions. Then the cells were washed three times at 5000  $xg$  for 10 min with distilled water and resuspended in 10 mM HEPES pH 7.4

### Cytoplasmic extracts

All procedures were conducted at 4 °C. Cells (grown under aerobic, microaerobic or anaerobic conditions) were centrifuged at 5000  $xg$  for 10 min, washed three times with distilled water and resuspended in 50 mL 10 mM HEPES, pH 7.4, supplemented with one tablet of protease-inhibitor cocktail (Complete) and

1 mM PMSF. Cells were disrupted by sonication using a Sonics VibraCell sonicator (Sonics & materials, Inc., Newtown, CT) 7 x 20 sec with 20 sec intervals. To remove unbroken cells the suspension was centrifuged at 10 000 xg for 10 min and the supernatant was recovered.

### **Protein concentration.**

Protein concentrations from intact *S. epidermidis* cells were determined by the biuret method [16]. Absorbance at 540 nm was read in a Beckman-Coulter DU50 spectrophotometer. For cytoplasmic extracts, protein concentration was measured by Bradford at 595 nm, using 1 to 2  $\mu$ L aliquots of the sample in a PolarStar Omega (BMG labtech, Ortenberg, Germany) [17].

### **Rate of Oxygen Consumption**

The rate of oxygen consumption was measured in a water-jacketed 1 mL chamber at 37 °C equipped with a Clark type electrode connected to a Strathkelvin model 782 oxymeter. Data were analyzed using the 782 Oxygen System Software (Warner/Strathkelvin Instruments) [12]. Reaction medium 10 mM HEPES pH 7.4 plus the indicated respiratory substrate: 33 mM ethanol, 10 mM lactate or 40 mM glucose. Bacteria, 0.5 mg prot mL<sup>-1</sup>.

### **Ethanol production**

Fermentation by cell cytoplasmic extracts (0.5 mg prot. mL<sup>-1</sup>) was measured in 0.1 M MES-TEA, pH 7.0, 1.8 mM NAD plus either 20 mM glucose or glycerol and incubated at 30 °C for 0, 2.5, 5 or 10 min. The reaction was stopped with 30% TCA, 0.1 mL and neutralized with NaOH. Ethanol was measured adding a 10  $\mu$ L aliquot (0.005 mg) of the supernatant to 0.2 mL 114 mM K<sub>2</sub>HPO<sub>4</sub>, pH 7.6. After 1 min, 30  $\mu$ g ADH mL<sup>-1</sup> was added, the sample was incubated for 30 min and O.D. was determined at 340 nm in a POLARstar Omega. Ethanol is reported as  $\mu$ mol ethanol (mg prot)<sup>-1</sup> [18].

### **ATP concentration**

The concentration of ATP was determined in cytoplasm extracts. Cytoplasmic extracts were resuspended to 0.025 mg protein in 0.15 mL reaction buffer (20 mM KH<sub>2</sub>PO<sub>4</sub>, 40 mM Na<sub>2</sub>HPO<sub>4</sub>, 80 mM NaCl plus 1 mM MgSO<sub>4</sub>). An ATP calibration curve was prepared freshly each day using lyophilized luciferase (Sigma-Aldrich). Luciferase was prepared following instructions by the provider and 0.02 mL was added to each sample in a 96-well microplate. Bioluminescence was detected in a POLARstar Omega luminometer (BGM LABTECH, Offenburg, Germany). [ATP] was reported as  $\mu\text{mol (mg prot)}^{-1}$  [19, 20].

### **Susceptibility to Hydrogen peroxide-mediated damage.**

The effect of [H<sub>2</sub>O<sub>2</sub>] on the viability of *S. epidermidis* was determined as previously reported [21]. Briefly, cells grown under aerobiosis, microaerobiosis or anaerobiosis were adjusted to an O.D.= 0.1 (600 nm). Then H<sub>2</sub>O<sub>2</sub> (0 to 25 mM as indicated) was added to the culture (final O.D.= 0.025). After 30 minutes, serial dilution of the cultures was performed in 0.9% NaCl. Afterwards 10  $\mu\text{L}$  of the 1:1000 diluted sample was plated in LB, 2% glucose agar plates and incubated 24 h at 37 °C. Colony forming units (CFU) were counted. CFU mL<sup>-1</sup> before addition of H<sub>2</sub>O<sub>2</sub> was assigned as 100%. The average of three experiments is shown with SD. ANOVA test and Tukey's multiple comparison-test were used. Significance was \**P* < 0.0001.

### **Biofilm formation and detection.**

The biofilm assay was performed using *S. epidermidis* cultures and sterile Costar 96-well polystyrene plates as previously reported with some modifications [12, 22]. Pre-cultures were grown overnight in trypticase soy broth (TSB) at 37°C. To evaluate the effect of different inhibitors, sodium cyanide (NaCN) 100  $\mu\text{M}$ , butane-1,4-bisphosphate(B1,4BP) 1 mM, both inhibitors, carbonyl cyanide m-chlorophenyl hydrazone (CCCP) 6  $\mu\text{M}$  and a control without treatment were added to the microplate at the beginning of the assay. Thereafter, the bacterial suspensions were diluted at D.O.= 0.02 and adjusted to 200  $\mu\text{L}$  with fresh TSB. The plate was incubated 24 hours at 37 °C with 5% CO<sub>2</sub>. After incubation, the TSB

medium was removed and the wells were washed twice with 200  $\mu$ L of phosphate-buffered saline (PBS) to remove non-adherent bacteria. The plates were dried for 1 hour at 60 °C and stained with 0.4% crystal violet solution for 10 min. The plates were washed under running tap water to remove any excess stain. Biofilm formation was determined by the solubilization of the crystal violet stain in 200 $\mu$ L of 33% glacial acetic acid for 10 min, shaking and measuring the absorbance (492 nm) with a microplate reader (Polar Star Omega, BMG Labtech).. Each sample was tested in three independent experiments in triplicate and compared with the control (without treatment) using one-way analysis of variance (ANOVA) followed by Dunnett's post hoc test.

## Genome analysis and Protein Modeling.

The genomic sequence of *S. epidermidis* ATCC 12228 was obtained from the NCBI database (GenBank: CP022247.1) [23]. NADH DH structures (NCBI protein id: ASJ93946.1, ASJ94976.1, ASJ93963.1) were modeled using 3D homology models from the Swiss Model- Expasy, Swiss Inst. of Bioinformatics Biozentrum, Univ. of Basel <https://swissmodel.expasy.org>

## RESULTS.

Oxygen is among the most important factors driving evolution. Its partial reduction products, the reactive oxygen species (ROS) destroy nucleic acids, proteins and membranes [24]. Thus, in spite of its remarkable electron acceptor properties, the dangerous oxygen molecule has to be dealt with carefully [25, 26]. *S. epidermidis* lives in hypoxic/anoxic environments, although it can adapt to aerobic environments. In order to follow the adaptation of *S. epidermidis*, it was cultivated at different [O<sub>2</sub>]. Cells grew proportionally to [O<sub>2</sub>]. That is, under aerobic conditions biomass yield was 8.58 g(ww)/L, three times higher than under microaerobiosis where biomass was 2.11 g(ww)/L or under anaerobiosis at 1.75 g(ww)/L.

Biomass data evidenced that at high [O<sub>2</sub>] cells grew better. In order to further explore the basis for the large increase in biomass under aerobic



conditions, it was decided to test the activity of the respiratory chain from *S. epidermidis* grown at different  $[O_2]$  (Figure 1). As expected, the ability of cells to consume oxygen was proportional to  $[O_2]$  in the growing environment, demonstrating the adaptability of *S. epidermidis* to varying conditions. In aerobic conditions, the rate of oxygen consumption in the presence of lactate was 70 natgO (mg prot. min)<sup>-1</sup>, at least five times higher than in microaerobic media, where the rate was 5 natgO (mg prot. min)<sup>-1</sup> or in those grown under anaerobic conditions, where it became negligible (Figure 1). In addition, it was observed that under aerobic conditions the best respiratory fuel was lactate, which was consumed around three times as fast as glucose or ethanol (Figure 1).

The activity of the respiratory chain correlated with the different growth rates of *S. epidermidis*. However, glycolysis can also constitute an important source of energy [27]. In fact, as low oxygen environments seem to be preferred by *S. epidermidis*, anaerobic glycolysis should be the preferred energy-yielding pathway in this bacterium. To test this, *S. epidermidis* was grown in the presence of different  $[O_2]$  and its ability to perform anaerobic glycolysis was measured. Substrates were glucose (Figure 2-A) or glycerol (Figure 2-B). The efficiency of *S. epidermidis* to ferment these two substrates was roughly equivalent. Also, measurements made at 2.5, 5 and 10 min of incubation did not result in modifications in the concentration of ethanol. When grown at different  $[O_2]$ , bacteria from anaerobic media were the most active, fermenting both glucose and glycerol (Figure 2), suggesting that glycolytic activity changes in the opposite sense as  $[O_2]$ .

Activation of glycolysis under anaerobiosis evidenced that not only the aerobic, but also the anaerobic metabolism of the cell adapts to  $[O_2]$  in the culture medium. Thus, we decided to measure the effect that growing the cells at different  $[O_2]$  would have on the concentration of ATP ([ATP]) (Figure 3). Contrary to what we expected from the low respiratory activity plus the small increase in fermentation activity observed under micro- and anaerobiosis, [ATP] increased at low  $[O_2]$ . The increase in [ATP] was roughly five times in microaerobiosis and three times in anaerobiosis (Figure 3). Aiming to understand such rise in ATP, we found that other bacteria, e.g. *Bacillus brevis* and *Escherichia coli*, react to substrate



depletion by adhering to glass surfaces and at the same time increase [ATP] two- to fivefold in comparison to planktonic cells [28]. In this regard, it has been reported that hypoxic stimuli induce biofilm formation in *S. epidermidis* [12].

In *Staphylococcus aureus*, expressing a deficient respiratory chain decreases sensitivity to  $H_2O_2$  [29], suggesting that anaerobiosis-adapted cells resist oxidative stress better. Here, as oxygen decreased in the growth medium, *S. epidermidis* switched its metabolic mode from aerobic to fermentative. Thus, we decided to test the sensitivity to ROS of *S. epidermidis* grown at different  $[O_2]$  to the presence of hydrogen peroxide (Figure 4) [30]. Even at the lowest concentrations of  $H_2O_2$  we used (0.5 mM), viability decreased in all cells. However, in all cases the aerobic-grown cells exhibited the poorest survival rates, while cells grown under anaerobiosis survived  $H_2O_2$  best, such that even at the highest  $H_2O_2$  concentration tested (25 mM  $H_2O_2$ ) a small amount of viable cells was detected (Figure 4). The increase in sensitivity to ROS observed in aerobically grown *S. epidermidis* was probably due to increased expression of the redox enzymes in the respiratory chain [12]. These redox enzymes contain different coenzymes and prosthetic groups, which normally become free radicals during their catalytic cycle that are perhaps activated by  $H_2O_2$  [26, 31].

When grown at high  $[O_2]$  *S. epidermidis* expressed an active respiratory chain. However, adaptation to high  $[O_2]$  also resulted in increased sensitivity to hydrogen peroxide. This probably indicates that there is a trade-off between ROS protection and higher growth in *S. epidermidis* according to the oxygen concentration. Which is why even when [ATP] was higher in cells grown at low  $[O_2]$ , their rate of growth decreased. This seemingly contradictory situation may be explained by proposing that when *S. epidermidis* finds a low  $[O_2]$ , which resembles that found in its normal niche, it redirects its ATP from growth to production of polysaccharides and proteins involved in biofilm generation [13, 32]. To analyze the ATP-dependence of biofilm formation, the ability of cells grown in hypoxic conditions to form biofilms was analyzed. It was observed that cells incubated in the presence of the respiratory chain inhibitor cyanide or the glycolytic inhibitor 1,4-bisphosphobutane, formed smaller biofilms than the control and that addition of

both inhibitors led to even smaller biofilms (Figure 5). This would suggest that biofilm formation activity is proportional to [ATP]. Complete ATP depletion by the uncoupler (CCCP) could not be evaluated due to its toxicity, which kills cells at 6  $\mu$ M (Result not Shown).

## DISCUSSION

Diverse facultative bacteria, adapt to the [O<sub>2</sub>] in the medium, differentially expressing redox enzymes in its respiratory chain. *S. epidermidis* does express different enzymes at varying [O<sub>2</sub>][12]. This traduced in different rates of oxygen consumption and growth. Aerobic metabolism enabled cells to grow more [33]. Still, enhanced growth resulted in higher sensitivity to H<sub>2</sub>O<sub>2</sub>, suggesting that high contents of redox enzymes make cells vulnerable to ROS. Indeed, when grown at high [O<sub>2</sub>], ROS sensitivity of *S. aureus* and *Enterococcus faecalis* increases, while their mutant counterparts, lacking an efficient respiratory chain resist ROS better [29].

When exposing *S. epidermidis* grown in different [O<sub>2</sub>] to oxygen peroxide, we observed a similar phenomenon: cells grown in hypoxic or anoxic environments, which exhibited low respiratory rates were more resistant to oxygen peroxide (Figure 4). Thus, as in *S. aureus*, the lack of an efficient respiratory chain in *S. epidermidis* enabled cells to survive ROS. This is probably useful when bacteria are confronted with the oxidative burst generated by the immune system.

The rate of oxygen consumption in aerobic grown cells was highest when lactate was the substrate. This is probably due to the direct donation of electrons to the menaquinone pool by lactate dehydrogenase [34, 35]. The slower rates observed for alcohol, may be due to an additional step as alcohol dehydrogenase electrons are first donated to Ndi2 [36]. The rate of respiration was also slow for glucose, probably for the same reason, that its intermediaries have to undergo many reactions before releasing electrons to the respiratory chain [37]. In contrast, under anaerobiosis, lactate-dependent oxygen consumption disappeared completely while a small rate of glucose-dependent oxygen consumption was still

present. In contrast, in *S. aureus* increased lactate dehydrogenase expression  
anaerobiosis has been reported [38]

In addition to lactate dehydrogenase, among the differentially expressed  
redox enzymes in both *S. epidermidis* [23] and *S. aureus* are Ndi2s, substituting  
complex I as in common in facultative bacteria. Structural modeling isoform 1  
(Suppl Fig. 1A) and isoform 2 (Suppl. Fig. 1B) illustrated the similarities of these  
enzymes to their counterparts in *S. aureus* [39]. In addition, *S. epidermidis* isoform  
three (Suppl. Fig 1C) was modeled successfully using the internal NADH  
dehydrogenase Ndi2 from the facultative yeast *S. cerevisiae* [40]. Thus, it is likely  
that Ndi2s may be used to predict the facultative nature of a species.

The normal habitat for *S. epidermidis* is the microaerobic environment found  
in different epidermic and dermic layers [41]. One strategy *S. epidermidis* uses  
when confronted with high  $[O_2]$  is the differential expression of a diverse number of  
redox enzymes in the respiratory chain. Reports indicate that when microaerophilic  
or anaerophilic bacteria find a suitable environment, they react manufacturing  
proteins and polysaccharides that enable them to form biofilms and attach to  
surfaces at low  $[O_2]$ . Avoiding high  $[O_2]$  involves both, anchoring in low oxygen  
environments and building biofilms as barriers against penetration of ROS or toxic  
substances [20]. Metabolic adaptation has also been reported for *Neisseria*  
*gonorrhoeae*, when it is stimulated to form biofilms. A proteomic analysis of *N.*  
*gonorrhoeae* biofilms evidenced up-regulation of proteins involved in anaerobic  
metabolism such as glycolysis and TCA cycle plus increased expression of those  
proteins involved in biofilm generation like pilus-associated proteins [42]. In  
addition, some oxidative stress genes are required for normal biofilm formation in  
*N. gonorrhoeae* [43].

The increase in ATP prior to biofilm formation has been reported in other  
bacteria. *Bacillus brevis* and *Escherichia coli* react to substrate depletion by  
adhering to glass surfaces and at the same time increase [ATP] two- to fivefold as  
compared to planktonic cells [28]. So the conditions where bacteria need to make  
biofilms promote saving ATP even at the expense of the growth rate. ATP is most  
likely needed to synthesize the extracellular proteins and the polysaccharide fibers

that anchor cells to surfaces and to each other. Inhibiting ATP production in micro- or anaerobic conditions by adding cyanide or 1,4-bisphosphobutane resulted in a reduced biofilm formation (Figure 5). This phenomenon is also observed when treating *S. epidermidis* with the nitrate reductase inhibitor methylamine in anaerobic conditions [12]. In contrast, in aerobiosis cyanide promotes biofilm formation [12].

Even when facultative bacteria such as *S. epidermidis* survive at high [O<sub>2</sub>], their habitat in the skin is hypoxic to anoxic. While they survive in aerobic environments their susceptibility to ROS-mediated damage and possibly to attack by macrophages increases. They thus present an oxygen avoidance behavior, anchoring and associating in hypoxic environments (Figure 6). Learning how avoidance works in *S. epidermidis* and other bacteria would impact both the physiologic and therapeutic field.

**Acknowledgements:** Partially funded by UNAM/DGAPA/PAPIIT IN203018. UHPD (MsSc) and EES (PhD) are graduate students in the Biochemistry Program at UNAM. LMG is in the Biomedical PhD program at UNAM. UHPD and LMG are CONACYT fellows. CUA present address: Fox-Chase Cancer Center, Philadelphia, PA. Technical help from Ramón Méndez-Franco is acknowledged. Authors do not have any conflicts of interests.

## References

- [1] Foster J, Ganatra M, Kamal I, et al. The Wolbachia genome of *Brugia malayi*: endosymbiont evolution within a human pathogenic nematode. *PLoS Biol* 2005; 3: e121.
- [2] Sender R, Fuchs S, Milo R. Revised Estimates for the Number of Human and Bacteria Cells in the Body. Epub ahead of print 2016. DOI: 10.1371/journal.pbio.1002533.
- [3] Berg RD. The indigenous gastrointestinal microflora. *Trends Microbiol* 1996; 4: 430–435.
- [4] Iwase T, Uehara Y, Shinji H, et al. *Staphylococcus epidermidis* Esp inhibits

- 355 Staphylococcus aureus biofilm formation and nasal colonization. *Nature*  
356 2010; 465: 346–349.
- 357 [5] Cogen AL, Yamasaki K, Sanchez KM, et al. Selective Antimicrobial Action Is  
358 Provided by Phenol-Soluble Modulins Derived from Staphylococcus  
359 epidermidis, a Normal Resident of the Skin. *J Invest Dermatol* 2010; 130:  
360 192–200.
- 361 [6] Grice EA, Segre JA. The skin microbiome. *Nat Rev Microbiol* 2011; 9: 244–  
362 53.
- 363 [7] Fang FC, Frawley ER, Tapscott T, et al. Bacterial Stress Responses during  
364 Host Infection. *Cell Host Microbe* 2016; 20: 133–43.
- 365 [8] Leid JG. *Bacterial Biofilms Resist Key Host Defenses Once in biofilms,*  
366 *bacterial pathogens resist antibiotics and withstand several host-defense*  
367 *measures, including phagocytosis,*  
368 [http://www.antimicrobe.org/history/Microbe\\_bacterial](http://www.antimicrobe.org/history/Microbe_bacterial) Biofilms resist Key host  
369 defenses.pdf (accessed 28 March 2019).
- 370 [9] Fey PD, Olson ME. Current concepts in biofilm formation of Staphylococcus  
371 epidermidis. *Future Microbiol* 2010; 5: 917–33.
- 372 [10] Büttner H, Mack D, Rohde H. Structural basis of Staphylococcus epidermidis  
373 biofilm formation: mechanisms and molecular interactions. *Front Cell Infect*  
374 *Microbiol* 2015; 5: 14.
- 375 [11] Cotter JJ, O’Gara JP, Mack D, et al. Oxygen-mediated regulation of biofilm  
376 development is controlled by the alternative sigma factor sigma(B) in  
377 Staphylococcus epidermidis. *Appl Environ Microbiol* 2009; 75: 261–4.
- 378 [12] Uribe-Alvarez C, Chiquete-Félix N, Contreras-Zentella M, et al.  
379 *Staphylococcus epidermidis*: metabolic adaptation and biofilm formation in  
380 response to different oxygen concentrations. *Pathog Dis* 2016; 74: ftv111.
- 381 [13] Lewis K. Persister cells, dormancy and infectious disease. *Nat Rev Microbiol*  
382 2007; 5: 48–56.
- 383 [14] Rosas-Lemus M, Chiquete-Félix N, Ruíz-Pérez K, et al. Sensitivity of the  
384 Mitochondrial Unspecific Channel of *Saccharomyces cerevisiae* to Butane-  
385 1,4-Bisphosphate, a Competitive Inhibitor of Fructose-1,6-Bisphosphate-

Aldolase. *ChemistrySelect* 2016; 1: 2930–2934.

- [15] Hartman FC, Barker R. An Exploration of the Active Site of Aldolase Using Structural Analogs of Fructose Diphosphate \*. *Biochemistry* 1965; 4: 1068–1075.
- [16] GORNALL AG, BARDAWILL CJ, DAVID MM. Determination of serum proteins by means of the biuret reaction. *J Biol Chem* 1949; 177: 751–66.
- [17] Bradford MM. A rapid and sensitive method for the quantitation of microgram quantities of protein utilizing the principle of protein-dye binding. *Anal Biochem* 1976; 72: 248–54.
- [18] Araiza-Olivera D, Chiquete-Felix N, Rosas-Lemus M, et al. A glycolytic metabolon in *Saccharomyces cerevisiae* is stabilized by F-actin. *FEBS J* 2013; 280: 3887–3905.
- [19] Mendoza-Hoffmann F, Pérez-Oseguera Á, Cevallos MÁ, et al. The Biological Role of the  $\zeta$  Subunit as Unidirectional Inhibitor of the F<sub>1</sub>F<sub>0</sub>-ATPase of *Paracoccus denitrificans*. *Cell Rep* 2018; 22: 1067–1078.
- [20] Palikaras K, Tavernarakis N. Intracellular Assessment of ATP Levels in *Caenorhabditis elegans*. *BIO-PROTOCOL*; 6. Epub ahead of print 5 December 2016. DOI: 10.21769/BioProtoc.2048.
- [21] Macvanin M, Hughes D. Assays of Sensitivity of Antibiotic-Resistant Bacteria to Hydrogen Peroxide and Measurement of Catalase Activity. In: *Methods in molecular biology (Clifton, N.J.)*, pp. 95–103.
- [22] Calà C, Amodio E, Di Carlo E, et al. Biofilm production in *Staphylococcus epidermidis* strains, isolated from the skin of hospitalized patients: genetic and phenotypic characteristics. *New Microbiol* 2015; 38: 521–9.
- [23] MacLea KS, Trachtenberg AM. Complete Genome Sequence of *Staphylococcus epidermidis* ATCC 12228 Chromosome and Plasmids, Generated by Long-Read Sequencing. *Genome Announc*; 5. Epub ahead of print 7 September 2017. DOI: 10.1128/genomeA.00954-17.
- [24] Ezraty B, Gennaris A, Barras F, et al. The gain of single electrons by oxygen (O<sub>2</sub>) generates partially reduced reactive oxygen species (ROS), including superoxide anions (O<sub>2</sub><sup>•−</sup>). *Nat Publ Gr*; 15. Epub ahead of print 2017. DOI:



- 417 10.1038/nrmicro.2017.26.
- 418 [25] Lane N. *Oxygen : the molecule that made the world*. Oxford University Press,  
419 2002.
- 420 [26] Rosas-Lemus M, Uribe-Alvarez C, Contreras-Zentella M, et al. Oxygen:  
421 From Toxic Waste to Optimal (Toxic) Fuel of Life. In: *Free Radicals and*  
422 *Diseases*. InTech. Epub ahead of print 26 October 2016. DOI:  
423 10.5772/63667.
- 424 [27] Somerville GA, Proctor RA. At the crossroads of bacterial metabolism and  
425 virulence factor synthesis in Staphylococci. *Microbiol Mol Biol Rev* 2009; 73:  
426 233–48.
- 427 [28] Hong Y, Brown DG. Variation in bacterial ATP level and proton motive force  
428 due to adhesion to a solid surface. *Appl Environ Microbiol* 2009; 75: 2346–  
429 53.
- 430 [29] Painter KL, Hall A, Ha KP, et al. The Electron Transport Chain Sensitizes  
431 Staphylococcus aureus and Enterococcus faecalis to the Oxidative Burst.  
432 *Infect Immun*; 85. Epub ahead of print December 2017. DOI:  
433 10.1128/IAI.00659-17.
- 434 [30] Lobritz MA, Belenky P, Porter CBM, et al. Antibiotic efficacy is linked to  
435 bacterial cellular respiration. *Proc Natl Acad Sci U S A* 2015; 112: 8173–80.
- 436 [31] Quinlan CL, Perevoshchikova I V, Hey-Mogensen M, et al. Sites of reactive  
437 oxygen species generation by mitochondria oxidizing different substrates.  
438 *Redox Biol* 2013; 1: 304–12.
- 439 [32] Beenken KE, Dunman PM, McAleese F, et al. Global Gene Expression in  
440 Staphylococcus aureus Biofilms. *J Bacteriol* 2004; 186: 4665–4684.
- 441 [33] Baez A, Shiloach J. Effect of elevated oxygen concentration on bacteria,  
442 yeasts, and cells propagated for production of biological compounds. *Microb*  
443 *Cell Fact* 2014; 13: 181.
- 444 [34] Götz F, Mayer S. Both terminal oxidases contribute to fitness and virulence  
445 during organ-specific Staphylococcus aureus colonization. *MBio* 2013; 4:  
446 e00976-13.
- 447 [35] Kane AL, Brutinel ED, Joo H, et al. Formate Metabolism in Shewanella



oneidensis Generates Proton Motive Force and Prevents Growth without an Electron Acceptor. *J Bacteriol* 2016; 198: 1337–46.

[36] Artzatbanov VYu, Petrov V V. Branched respiratory chain in aerobically grown *Staphylococcus aureus*--oxidation of ethanol by cells and protoplasts. *Arch Microbiol* 1990; 153: 580–4.

[37] Ferreira MT, Manso AS, Gaspar P, et al. Effect of oxygen on glucose metabolism: utilization of lactate in *Staphylococcus aureus* as revealed by in vivo NMR studies. *PLoS One* 2013; 8: e58277.

[38] Fuchs S, Pané-Farré J, Kohler C, et al. Anaerobic gene expression in *Staphylococcus aureus*. *J Bacteriol* 2007; 189: 4275–89.

[39] Sousa FM, Sena F V., Batista AP, et al. The key role of glutamate 172 in the mechanism of type II NADH:quinone oxidoreductase of *Staphylococcus aureus*. *Biochim Biophys Acta - Bioenerg* 2017; 1858: 823–832.

[40] Yamashita T, Inaoka DK, Shiba T, et al. Ubiquinone binding site of yeast NADH dehydrogenase revealed by structures binding novel competitive- and mixed-type inhibitors. *Sci Rep* 2018; 8: 2427.

[41] Peyssonnaud C, Boutin AT, Zinkernagel AS, et al. Critical Role of HIF-1 $\alpha$  in Keratinocyte Defense against Bacterial Infection. *J Invest Dermatol* 2008; 128: 1964–1968.

[42] Phillips NJ, Steichen CT, Schilling B, et al. Proteomic Analysis of *Neisseria gonorrhoeae* Biofilms Shows Shift to Anaerobic Respiration and Changes in Nutrient Transport and Outermembrane Proteins. *PLoS One* 2012; 7: e38303.

[43] Falsetta ML, Steichen CT, McEwan AG, et al. The Composition and Metabolic Phenotype of *Neisseria gonorrhoeae* Biofilms. *Front Microbiol* 2011; 2: 75.

## Figure Legends.

**Figure. 1. Rate of oxygen consumption by *S. epidermidis* in the presence of different respiratory substrates.** Experimental conditions: 10 mM HEPES (pH 7.4), 10 mM lactate, 40 mM glucose or 33 mM ethanol. Cells were grown at different [O<sub>2</sub>] as follows: aerobic (empty bars), microaerobic (gray bars) and anaerobic (black bars).

**Figure. 2. Fermentation by *S. epidermidis* grown at different [O<sub>2</sub>].** Cytoplasmic extracts were obtained from *S. epidermidis* grown under aerobic, microaerobic or anaerobic conditions. Fermentation by cell cytoplasmic extracts (0.5 mg prot. mL<sup>-1</sup>) was measured using A) 20 mM glucose or B) 20 mM glycerol. Samples were incubated at 30 °C for: 2.5 min (black columns), 5 min (gray columns) or 10 min (white columns). Results are reported as μmol ethanol per mg protein. Tukey's comparison test was used to determine significant differences (\**P* < 0.05).

**Figure 3. Intracellular ATP concentrations in *S. epidermidis* grown at different [O<sub>2</sub>].** Cells were grown at different [O<sub>2</sub>] in LB plus glucose. Cytoplasmic extracts were obtained from each of these cultures and used to measure intracellular ATP. ATP concentration was estimated using luciferase and interpolating into a standard curve (See methods). The average of three experiments is shown with SD. \* indicates significant difference *P* < 0.05.

**Figure 4. H<sub>2</sub>O<sub>2</sub> effect on cellular viability.** *S. epidermidis* susceptibility to hydrogen peroxide was determined using 0, 0.5, 1, 5, 10 or 25 mM of H<sub>2</sub>O<sub>2</sub> in each group: aerobiosis (black bar), microaerobiosis (gray bar) or anaerobiosis (white bar). After 30 min of incubation with H<sub>2</sub>O<sub>2</sub>, the samples were diluted 1:1000, 10 μl were taken and plated in LB plus 2% glucose-agar. CFU/mL were counted taking the samples without treatment as 100% viable cells. The average of three experiments is shown with SD. Significance \**P* < 0.0001.

**Figure 5. *In vitro* biofilm inhibition assay.** *S. epidermidis* in microaerobic condition biofilm formation was determined using 100  $\mu$ M NaCN, 1 mM B1,4BP or both inhibitors and compared to a control without inhibitors. After 24 hours of incubation, biofilm generation was evaluated by measuring the absorbance to 492 nm with a microplate reader. Each sample was compared with the control (without treatment) using ANOVA and Dunnett's post hoc test. Significance \* $P < 0.0001$ .

**Figure 6. Cartoon depicting the shift that *Staphylococcus epidermidis* makes when [O<sub>2</sub>] decreases in the growth medium.** (A). When high oxygen concentrations are found in the medium, *S. epidermidis* cells are soluble, as planktonic cells and may flow with the blood in vessels. (B) In contrast, under micro- or anaerobic conditions the cells shift to a fermentative metabolism and ATP accumulates in preparation for adhesion to a suitable surface (i.e. epithelia, catheters, valves) and the eventual formation of a biofilm. In this state the cells exhibit more resistance to H<sub>2</sub>O<sub>2</sub> mediated damage. Excess ATP is probably used to produce adhesion proteins and poly-N-acetylglucosamine (gray fibers in the illustration)

**Supplementary Figure 1. Modeling of NADH type II dehydrogenases from *S. epidermidis*.** Images on the left are models made after the templates shown on the right. (a) *S. epidermidis* NCBI protein id: ASJ93946.1 modeled after the crystal structure of a putative NADH- dependent flavin oxidoreductase from *S. aureus* SMTL ID: 3I5a.1 (Lam, R. et al. unpublished). (b) *S. epidermidis* NCBI protein id: ASJ94976.1 modeled using the crystal structure of a NADH-quinone oxidoreductase (NDH-II) from *S. aureus* E172S mutant SMTL ID: 5na4.1 [34]. (c) *S. epidermidis* NCBI protein id: ASJ93963.1 modeled using as a template the crystal structure of the Ndi1 protein from *Saccharomyces cerevisiae* in complex with the competitive inhibitor stigmatellin SMTL ID: 5yiw.1 [40].

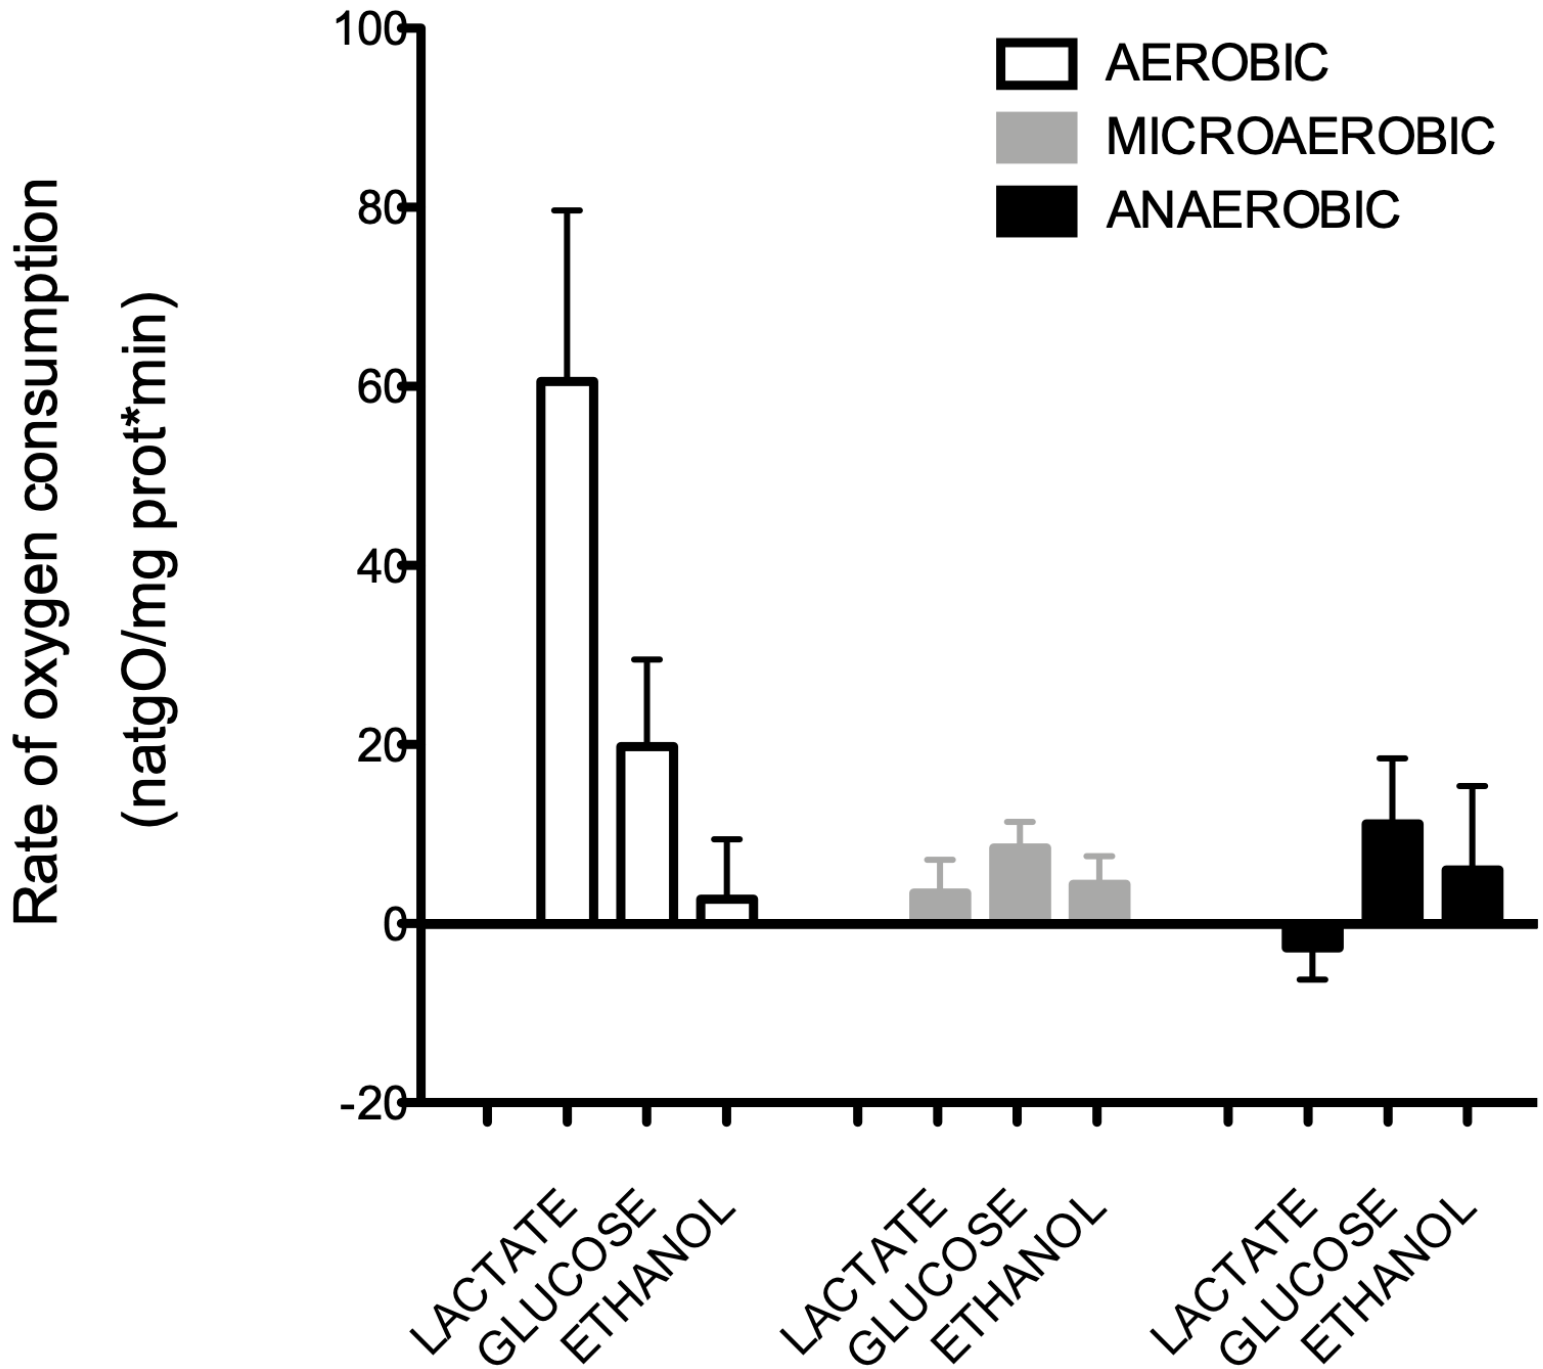

A

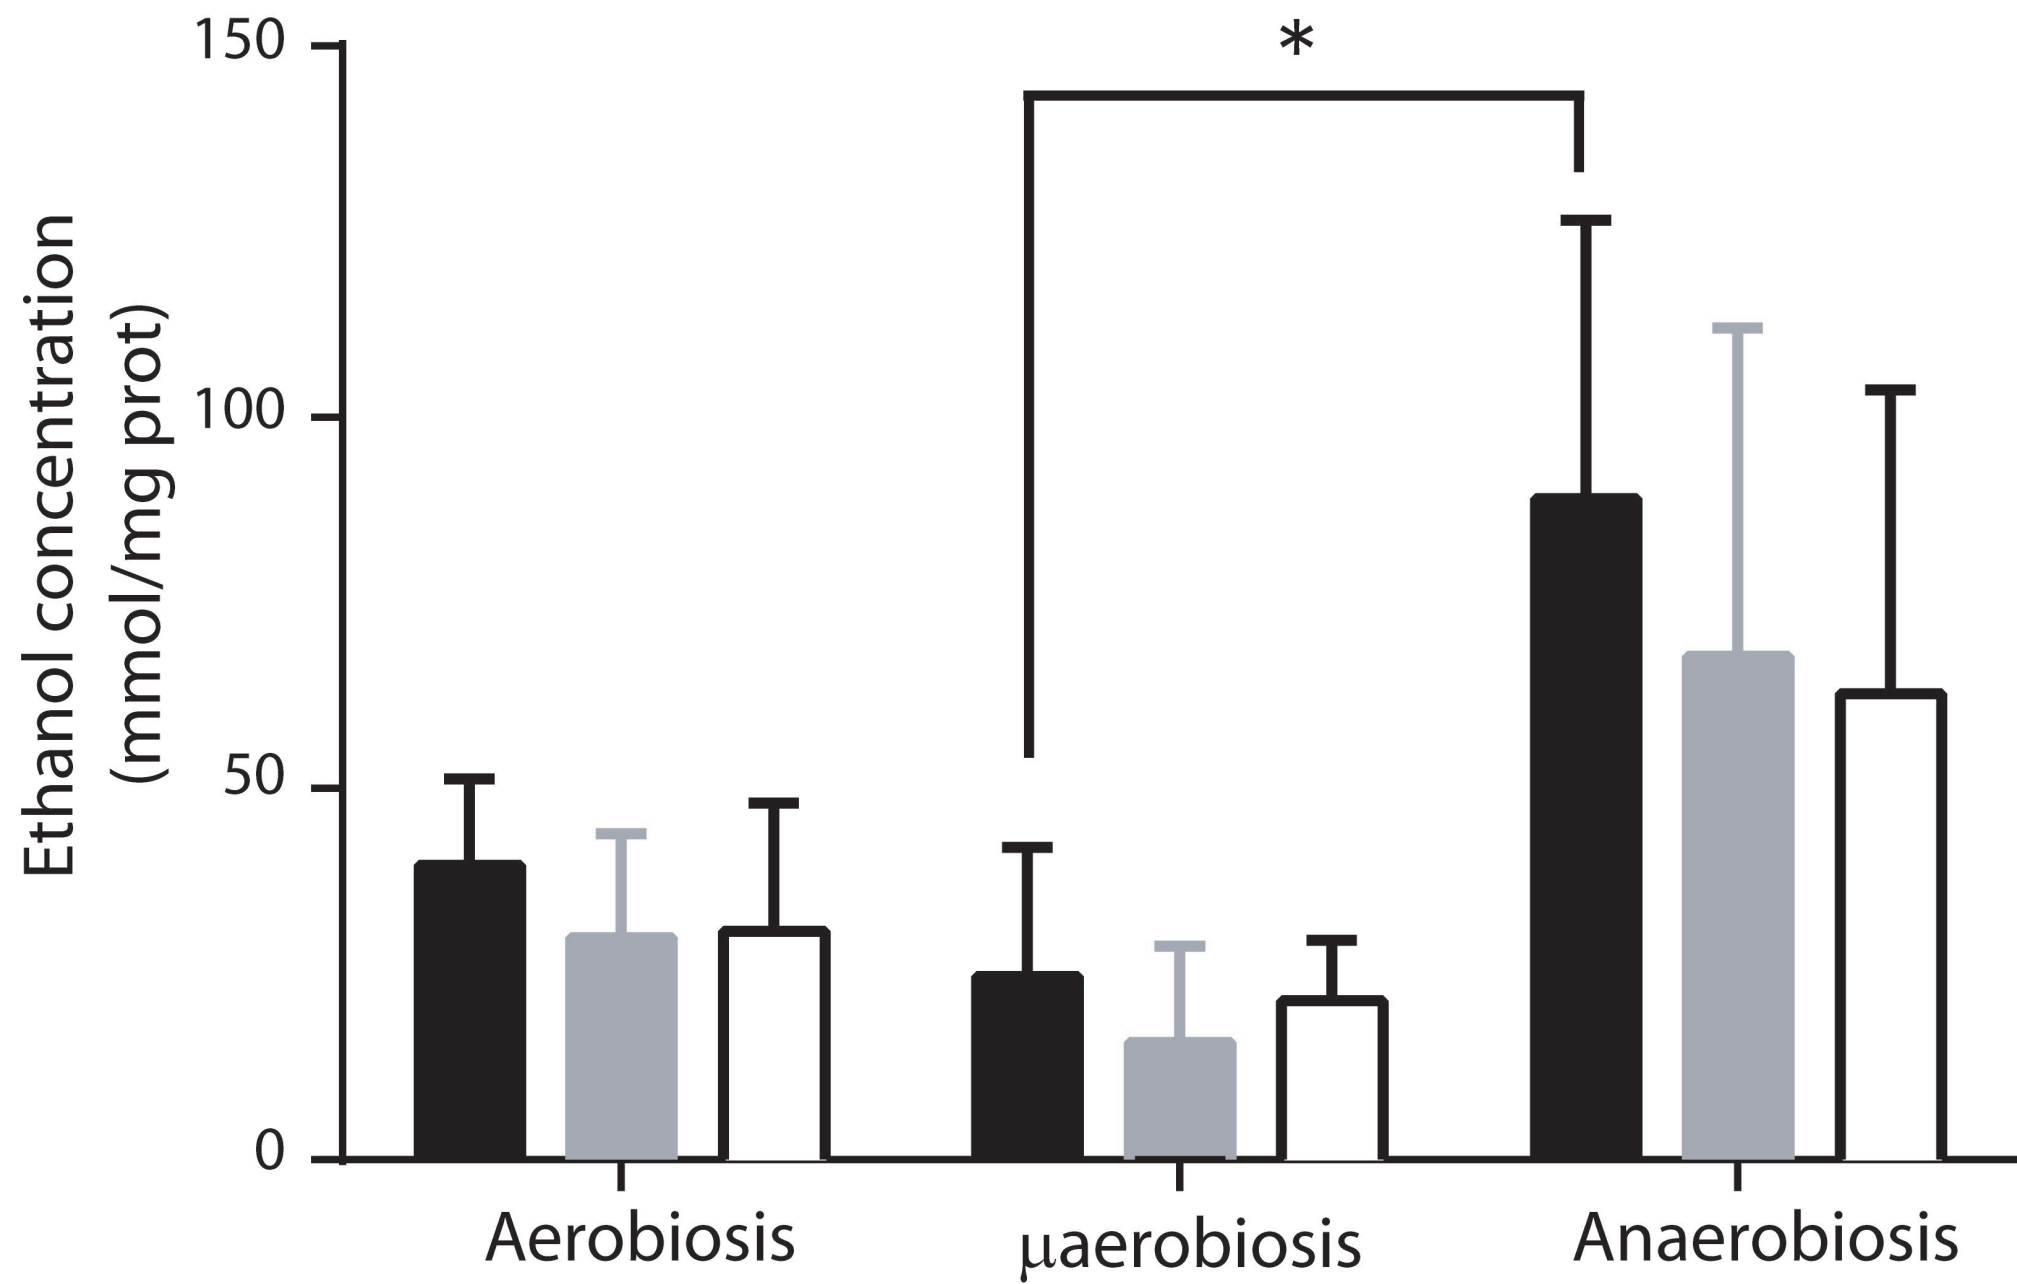

**B**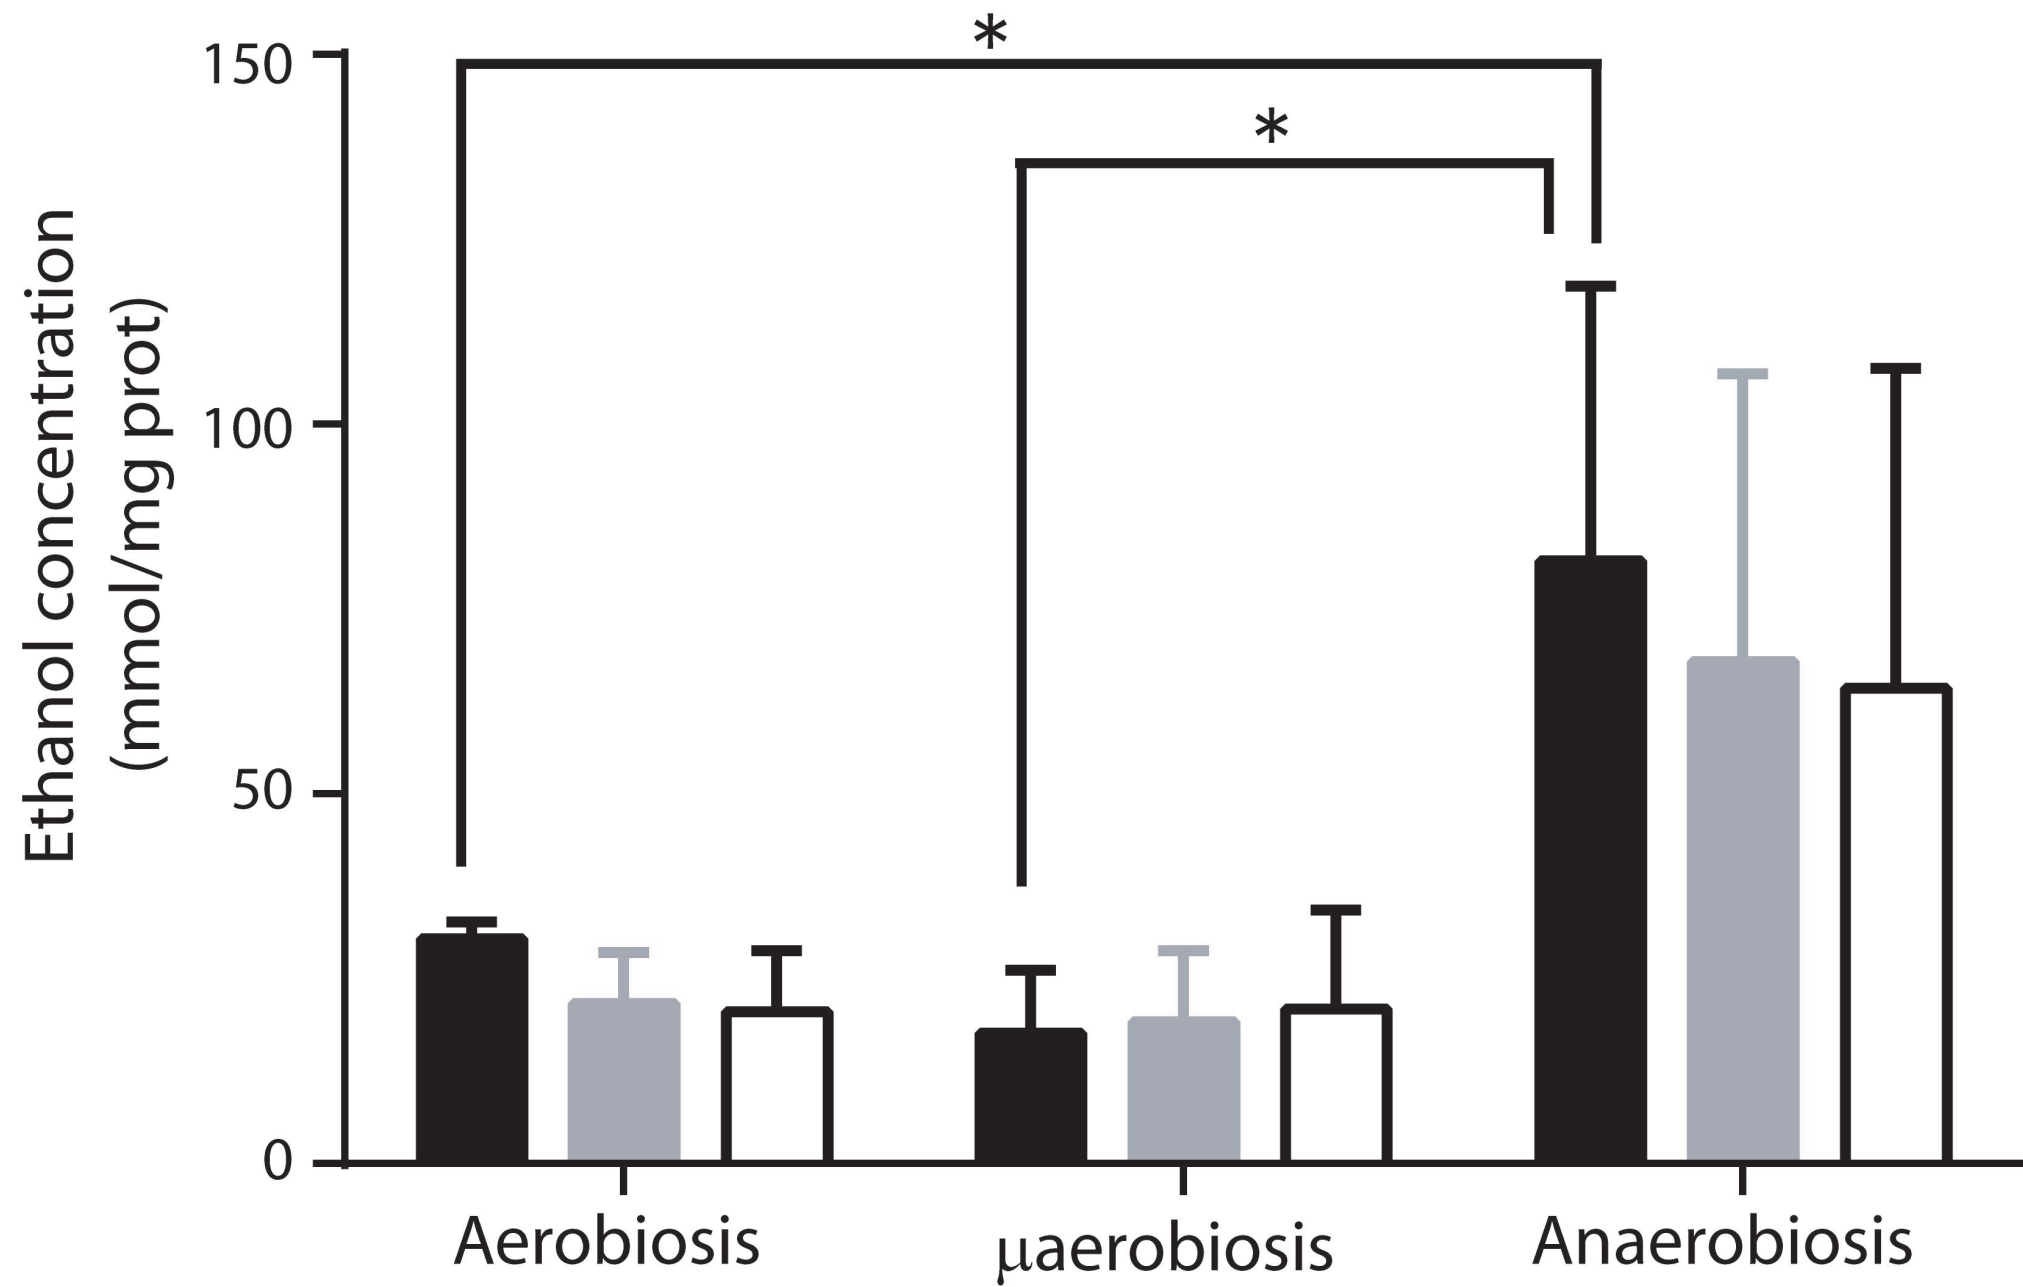



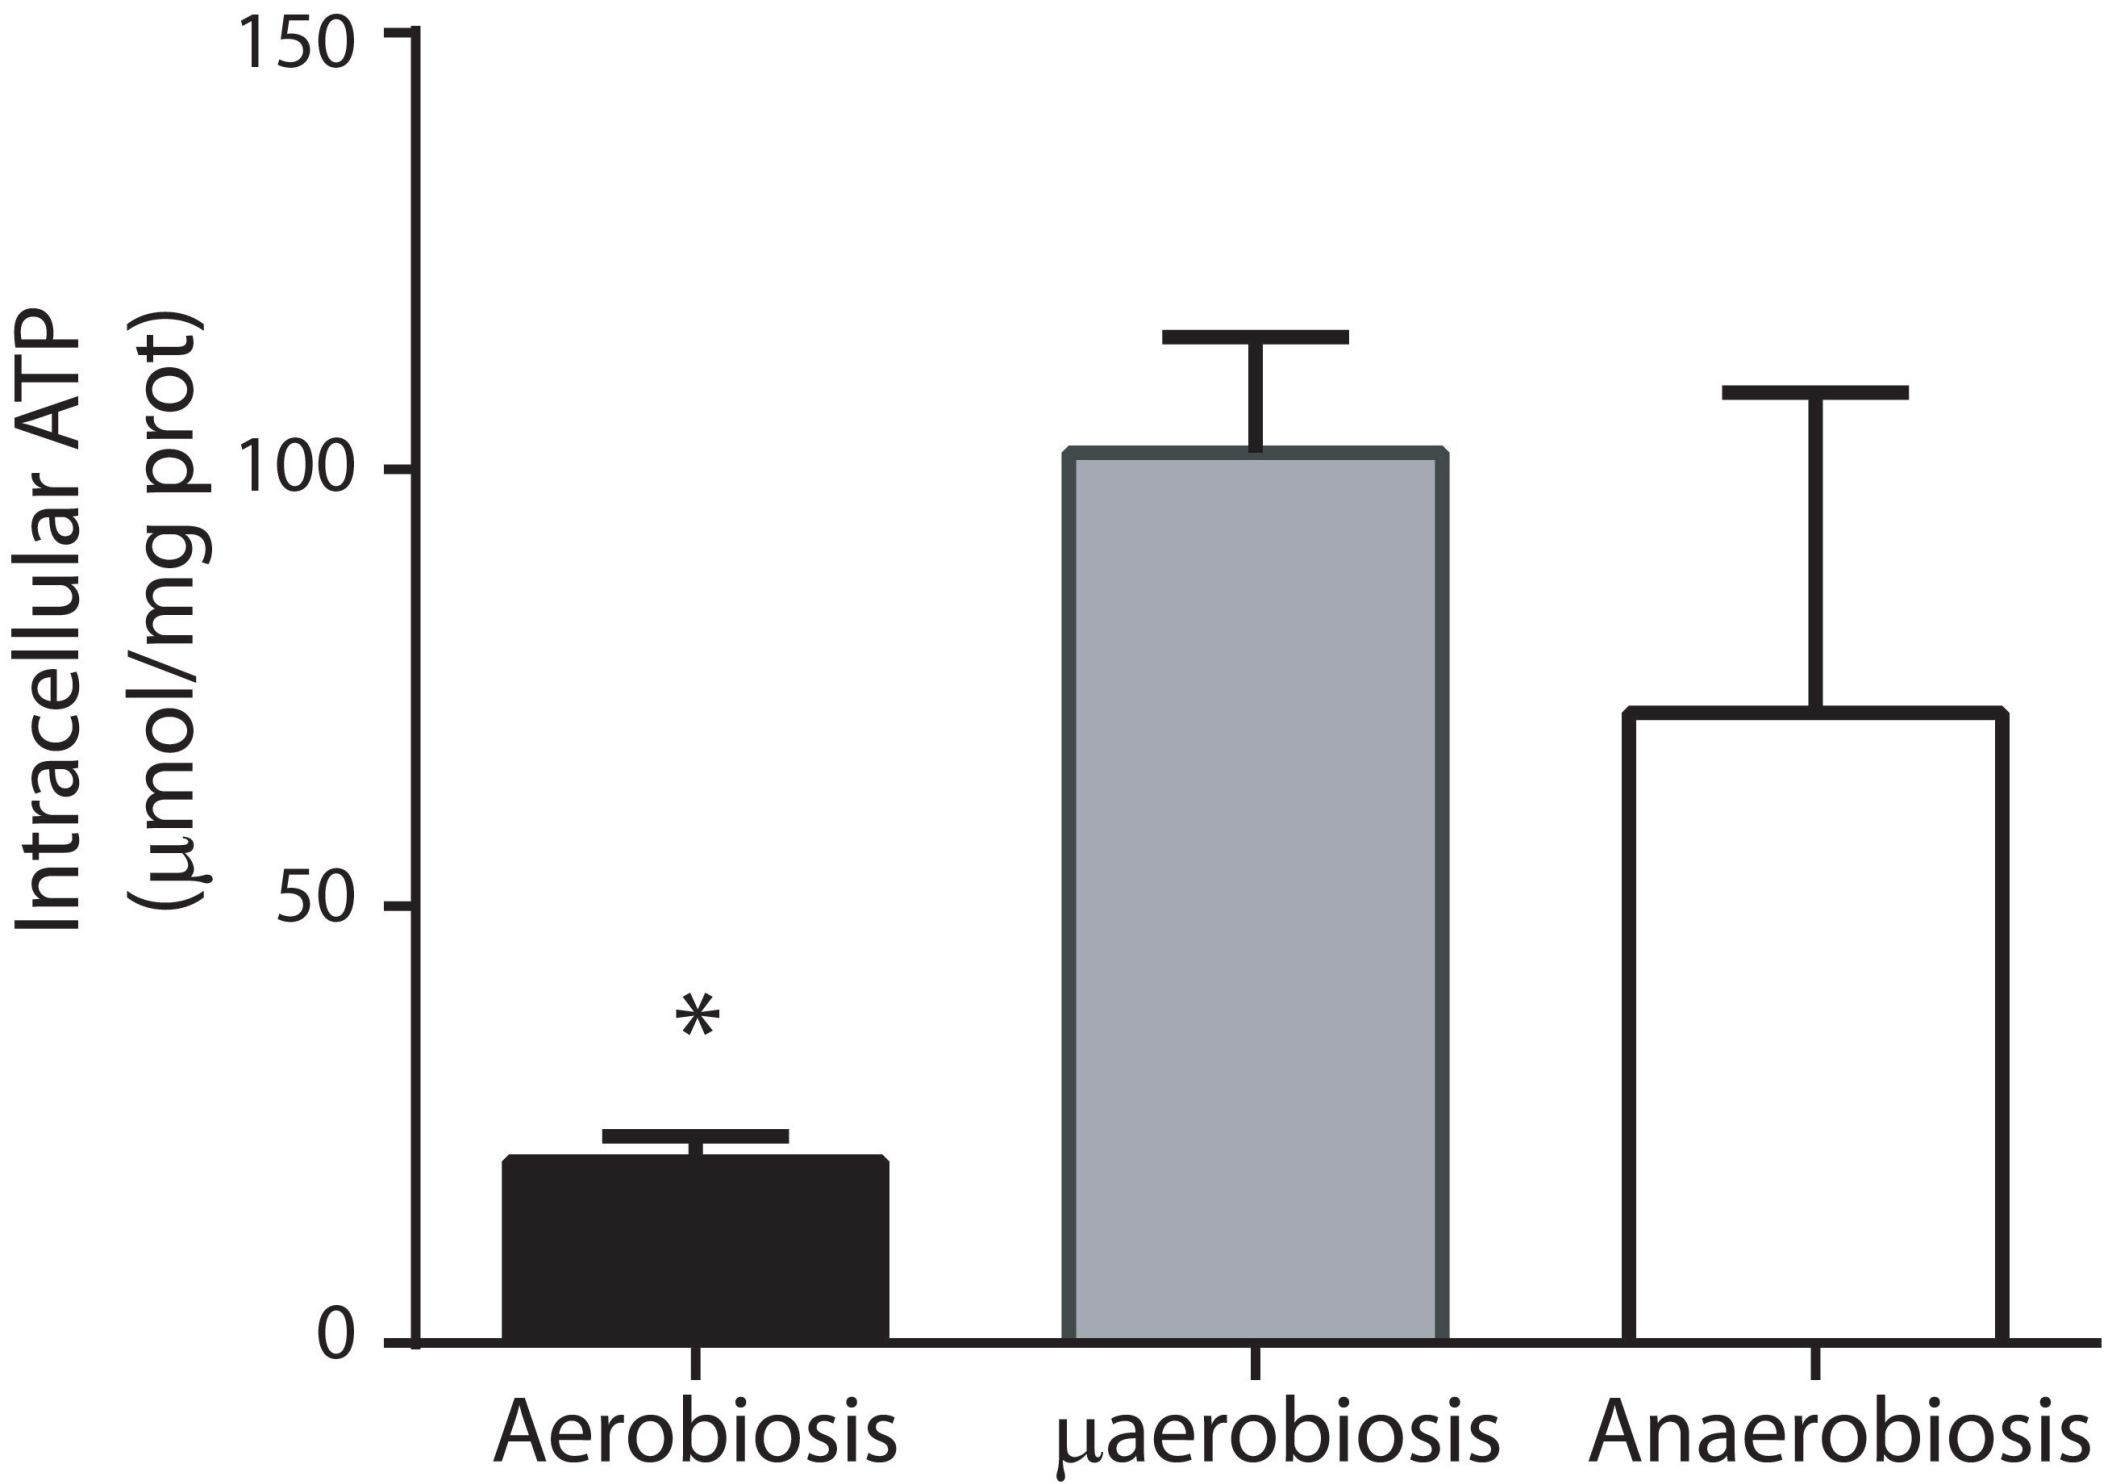

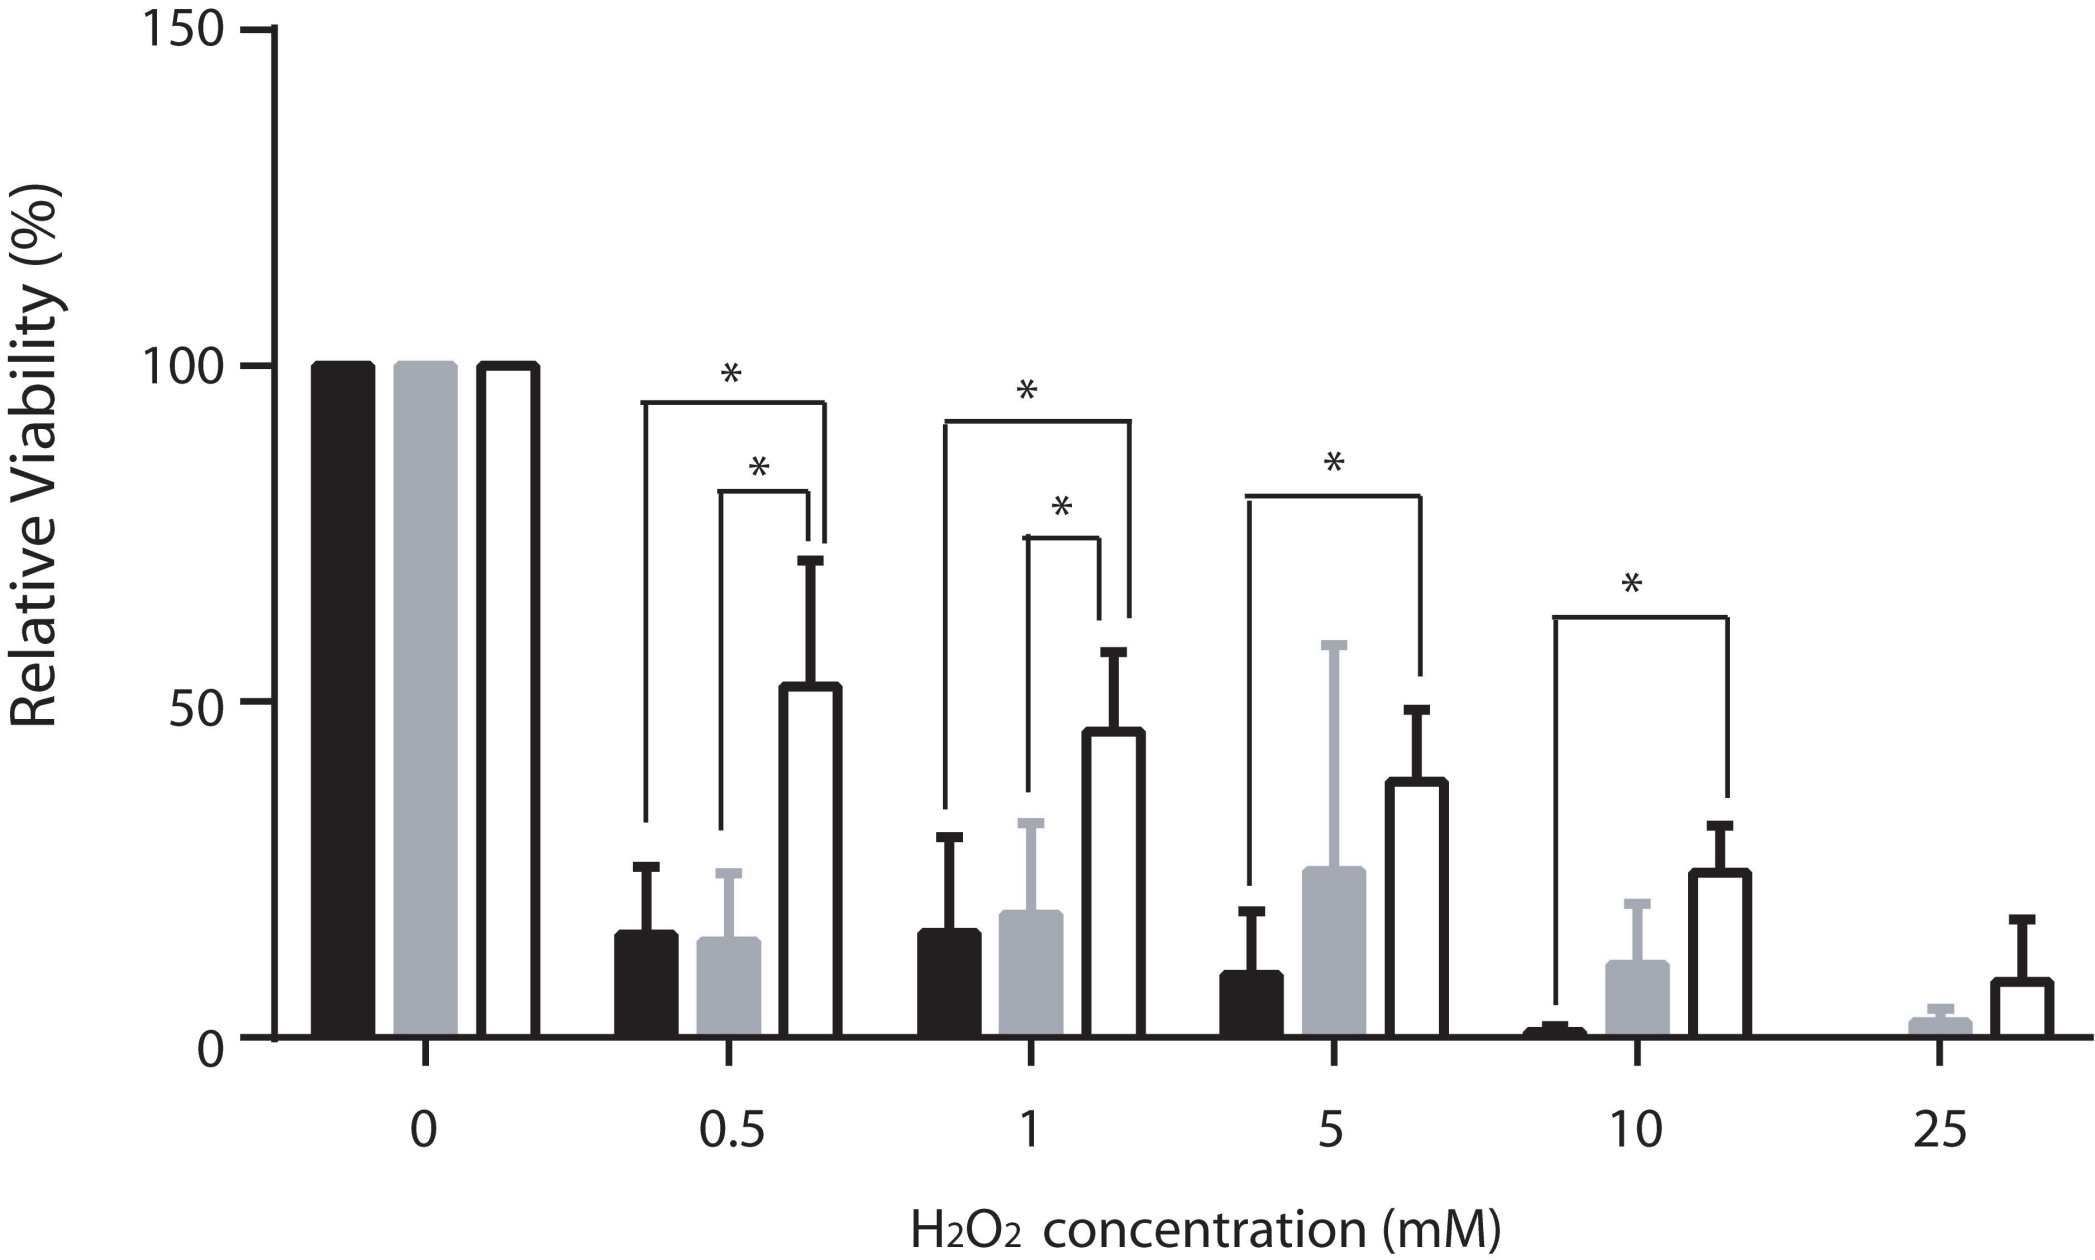

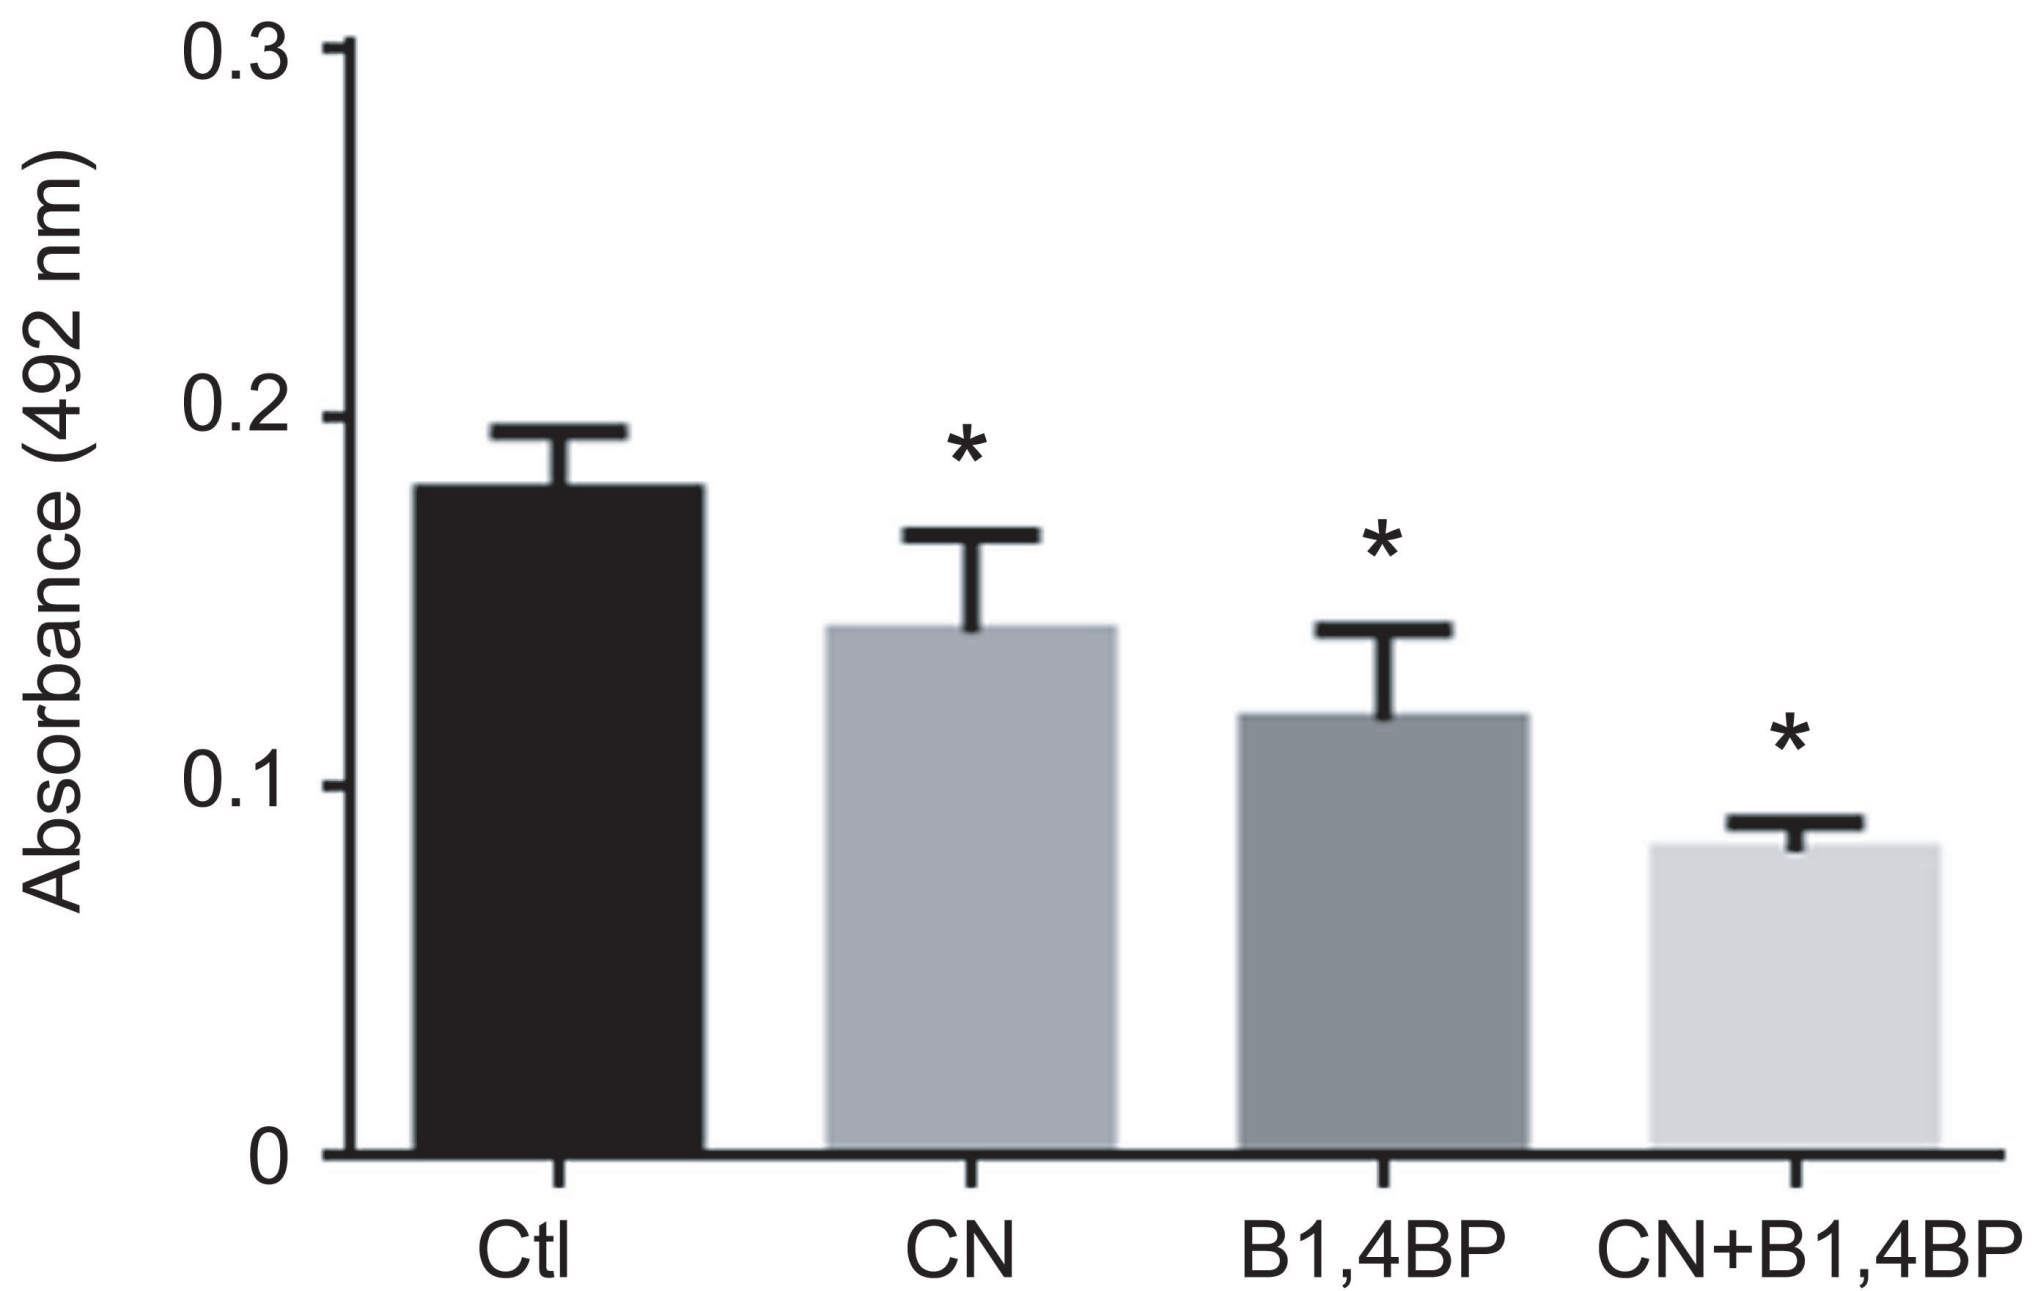

# High oxygen

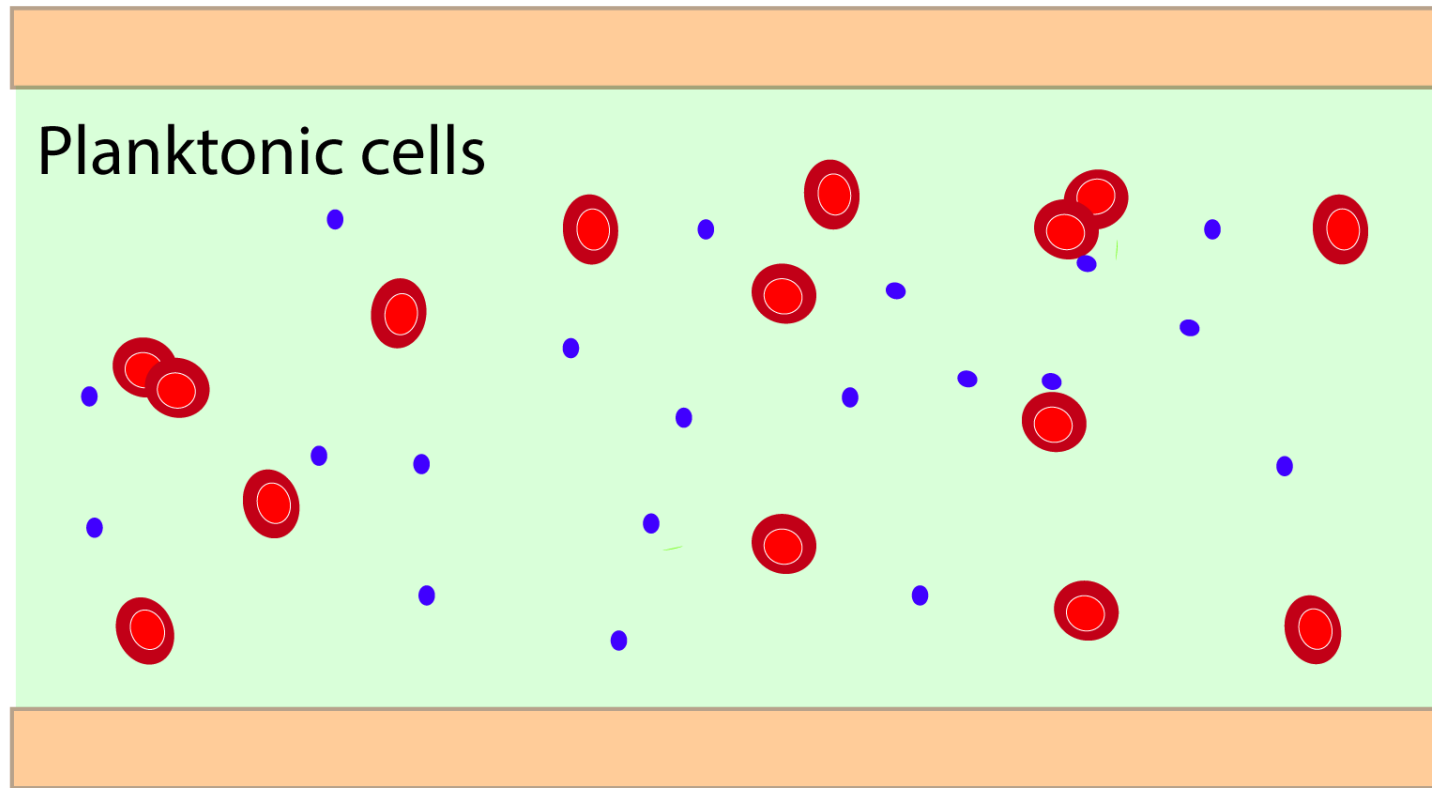

# Low oxygen/High Energy

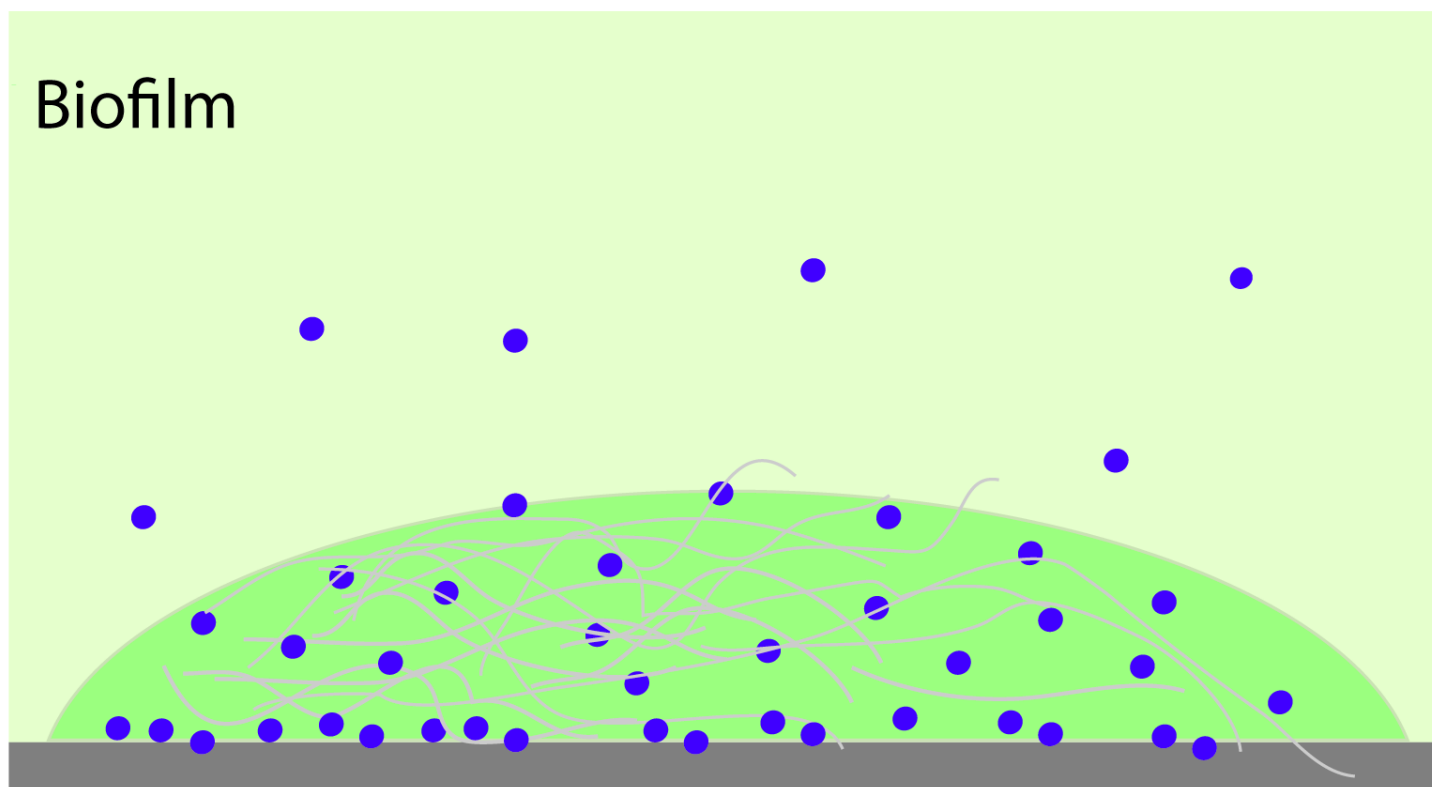

Source: http://biorxiv.org/content/10.1101/665356v1.full.pdf
